# Supplementary material for: Tetraarylphosphonium polyelectrolyte chromophores: synthesis, stability, photophysics, film morphology and critical surface energy
Source: Royal Society of Chemistry journal article supplement (doi:10.1039/c4py01483a), 2014-12-11
Supplement: c4py01483a1.pdf [file c4py01483a1.pdf]

Electronic Supplementary Information (ESI)

**Tetraarylphosphonium Polyelectrolyte Chromophores:  
Synthesis, Stability: Photophysics, Film Morphology and  
Critical Surface Energy**

Monte S. Bedford,<sup>a</sup> Xiaoyan Yang,<sup>c</sup> Kara M. Jolly,<sup>b</sup> Rachel L. Binnicker,<sup>b</sup> Samuel B. Cramer,<sup>b</sup> Caitlin E. Keen,<sup>b</sup> Connor J. Mairena,<sup>b</sup> Amar P. Patel,<sup>b</sup> Yuriy Galabura,<sup>a</sup> Igor Luzinov,<sup>a</sup> and Rhett C. Smith<sup>b,c,d\*</sup>

<sup>a</sup> *Department of Materials Science and Engineering, Clemson University, Clemson, SC 29634.*

<sup>b</sup> *Laboratory for Creative Inquiry in Chemistry, Clemson University, Clemson, SC 29634.*

<sup>c</sup> *Department of Chemistry, Clemson University, Clemson, SC 29634.*

<sup>d</sup> *Center for Optical Materials Science and Engineering Technology, Clemson University, Anderson, SC 29634.*

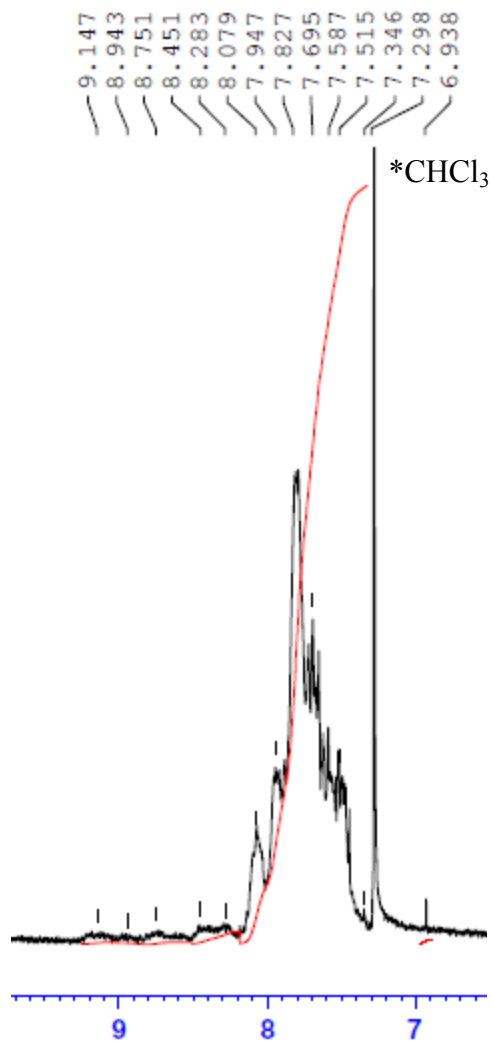

**Figure S1.** Aromatic region of the  $^1\text{H}$  NMR spectrum of **FLoct** ( $\text{CDCl}_3$ , 300 MHz).

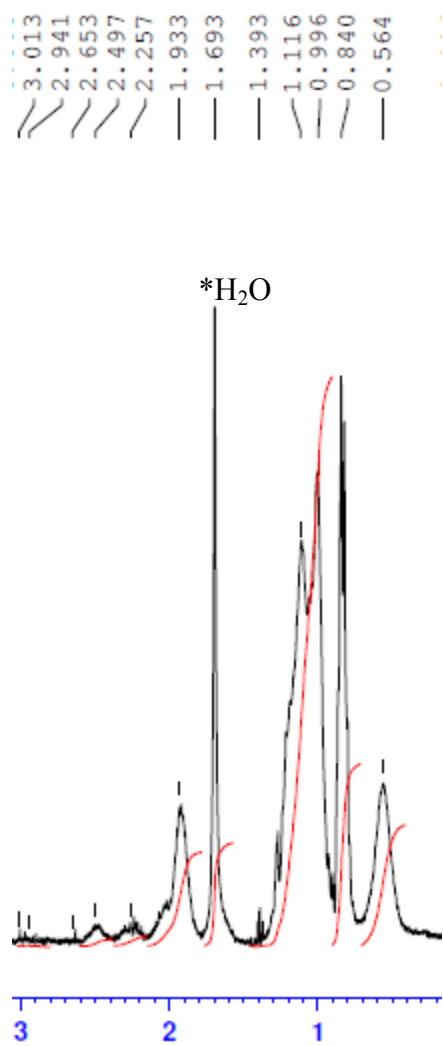

**Figure S2.** Aliphatic region of the <sup>1</sup>H NMR spectrum of **FLoct** (CDCl<sub>3</sub>, 300 MHz).

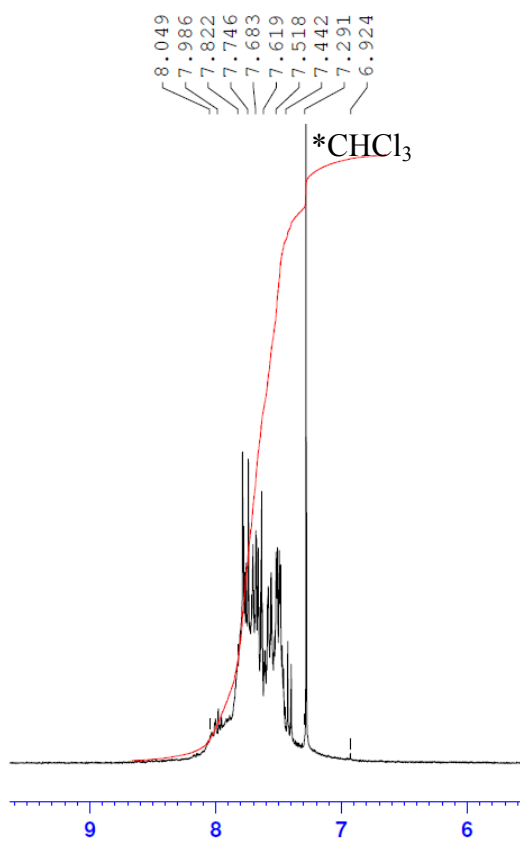

**Figure S3.** Proton NMR spectrum of **FLone** (CDCl<sub>3</sub>, 300 MHz).

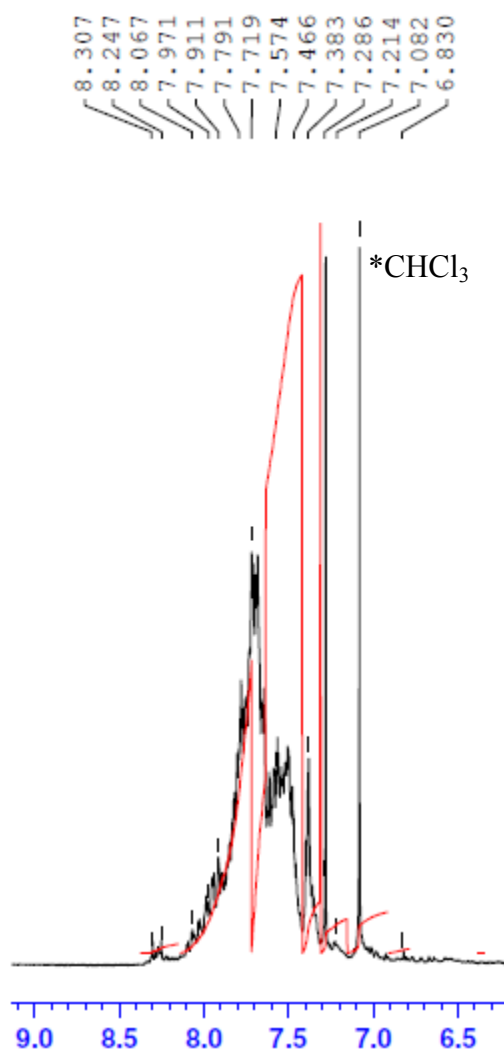

**Figure S4.** Aromatic region of the <sup>1</sup>H NMR spectrum of **PhOx** (CDCl<sub>3</sub>, 300 MHz).

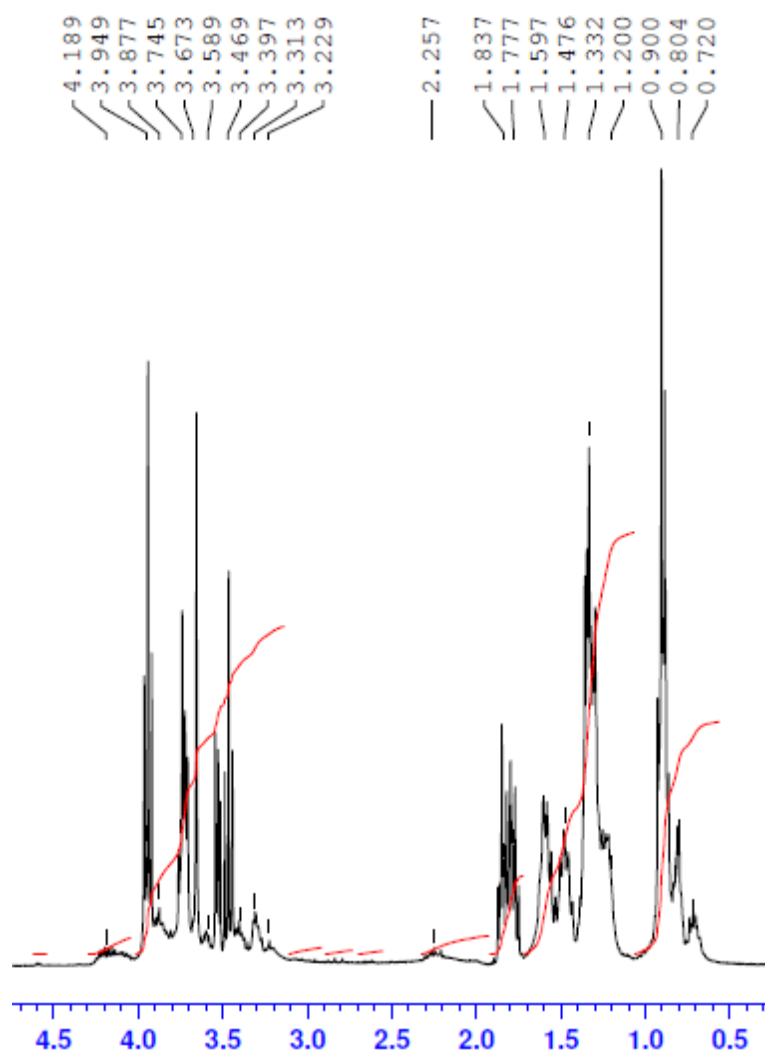

**Figure S5.** Aliphatic region of the  $^1\text{H}$  NMR spectrum of **PhOx** ( $\text{CDCl}_3$ , 300 MHz).
